# Supplementary material for: High Canonical Wnt/β-Catenin Activity Sensitizes Murine Hematopoietic Stem and Progenitor Cells to DNA Damage
Source: PubMed Central journal article supplement (PMC6987068; doi:10.1007/s12015-019-09930-2), 2019-12-03

**NIR**

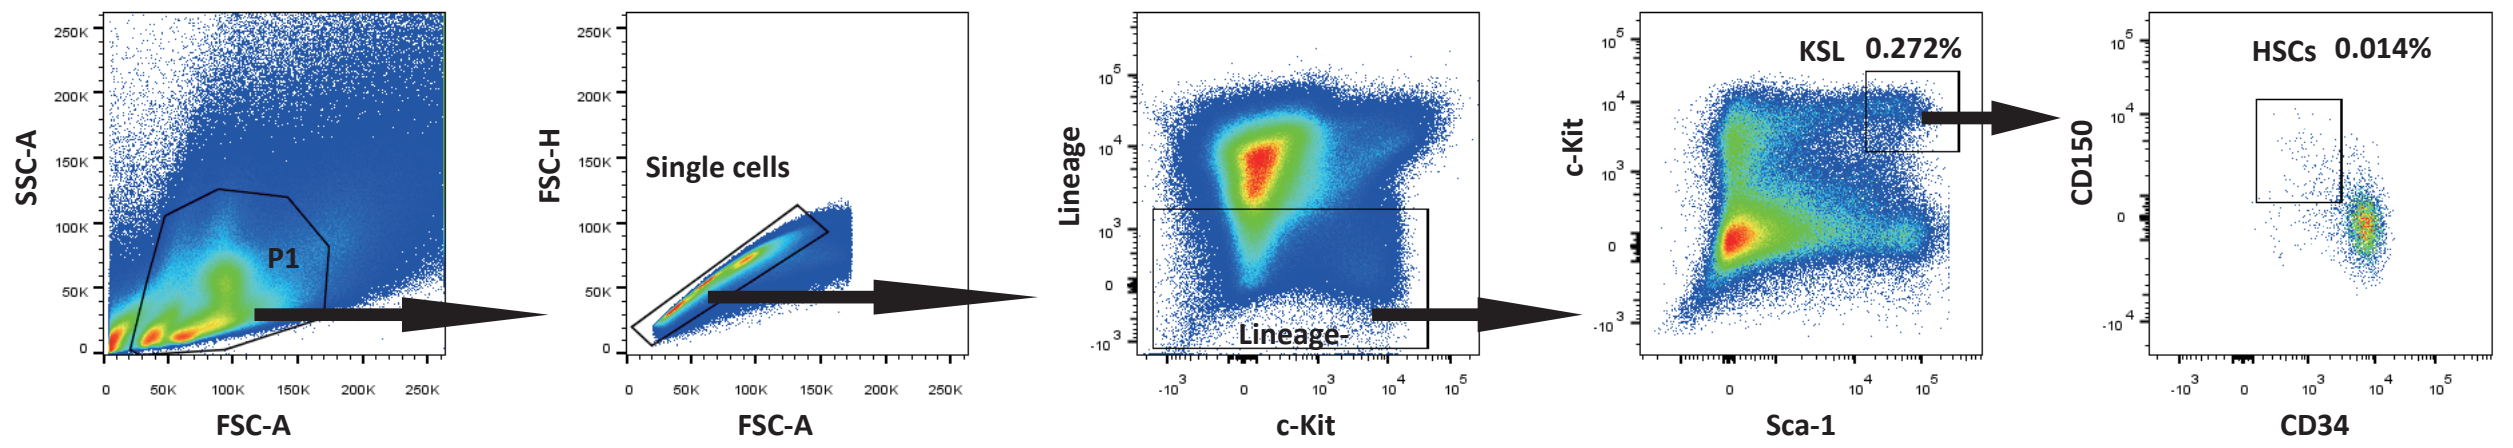

**IR 5h**

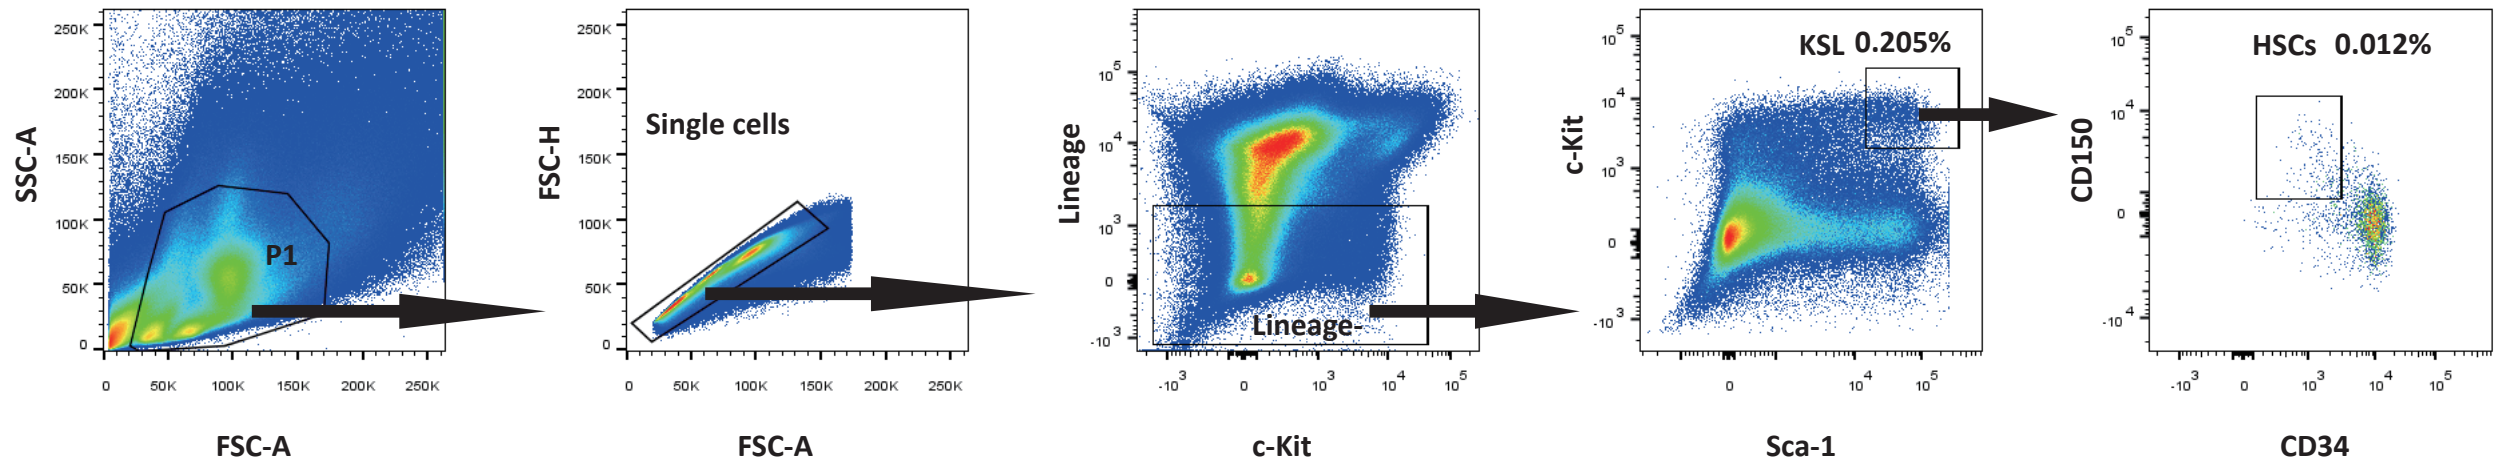

**IR 24h**

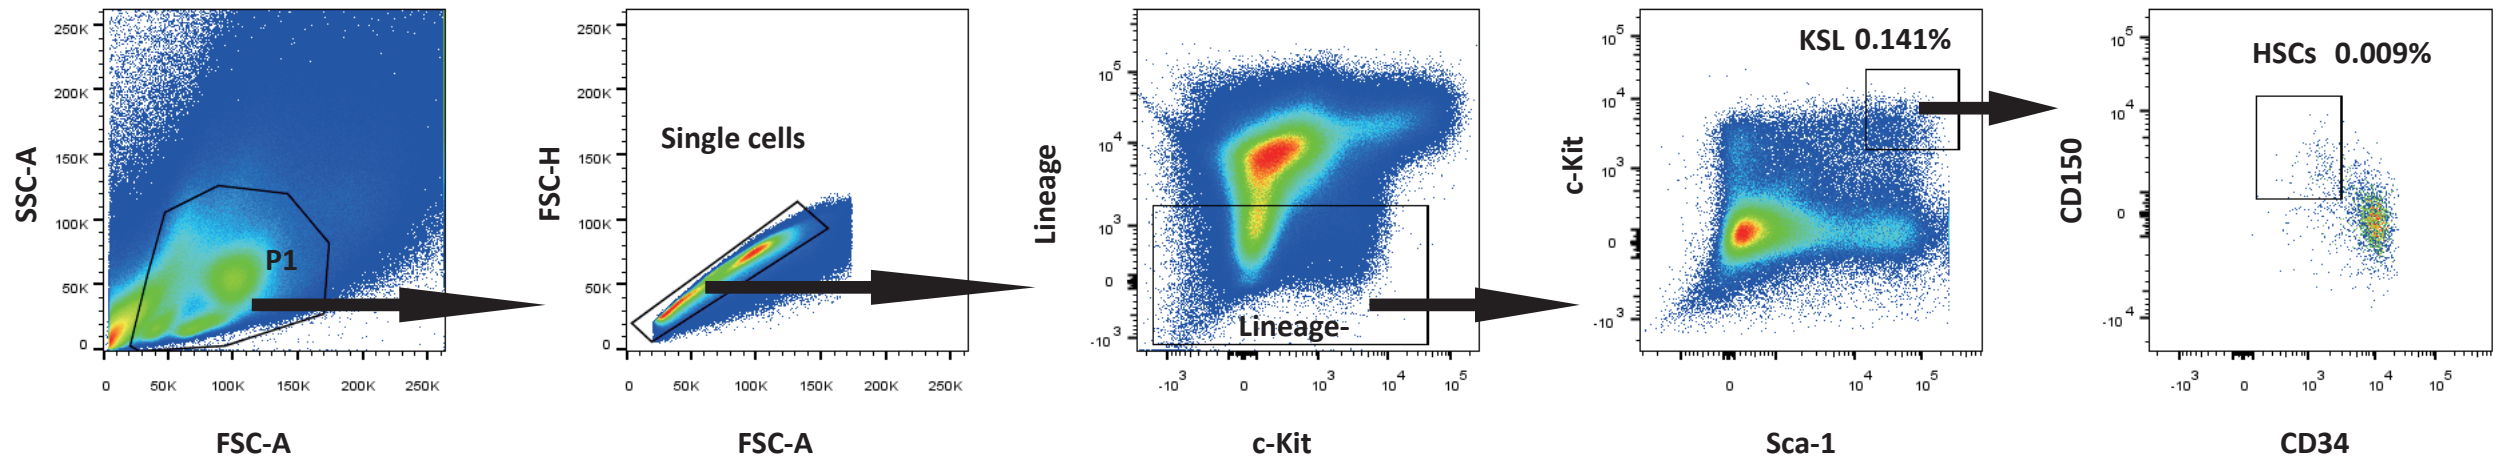

**IR 48h**

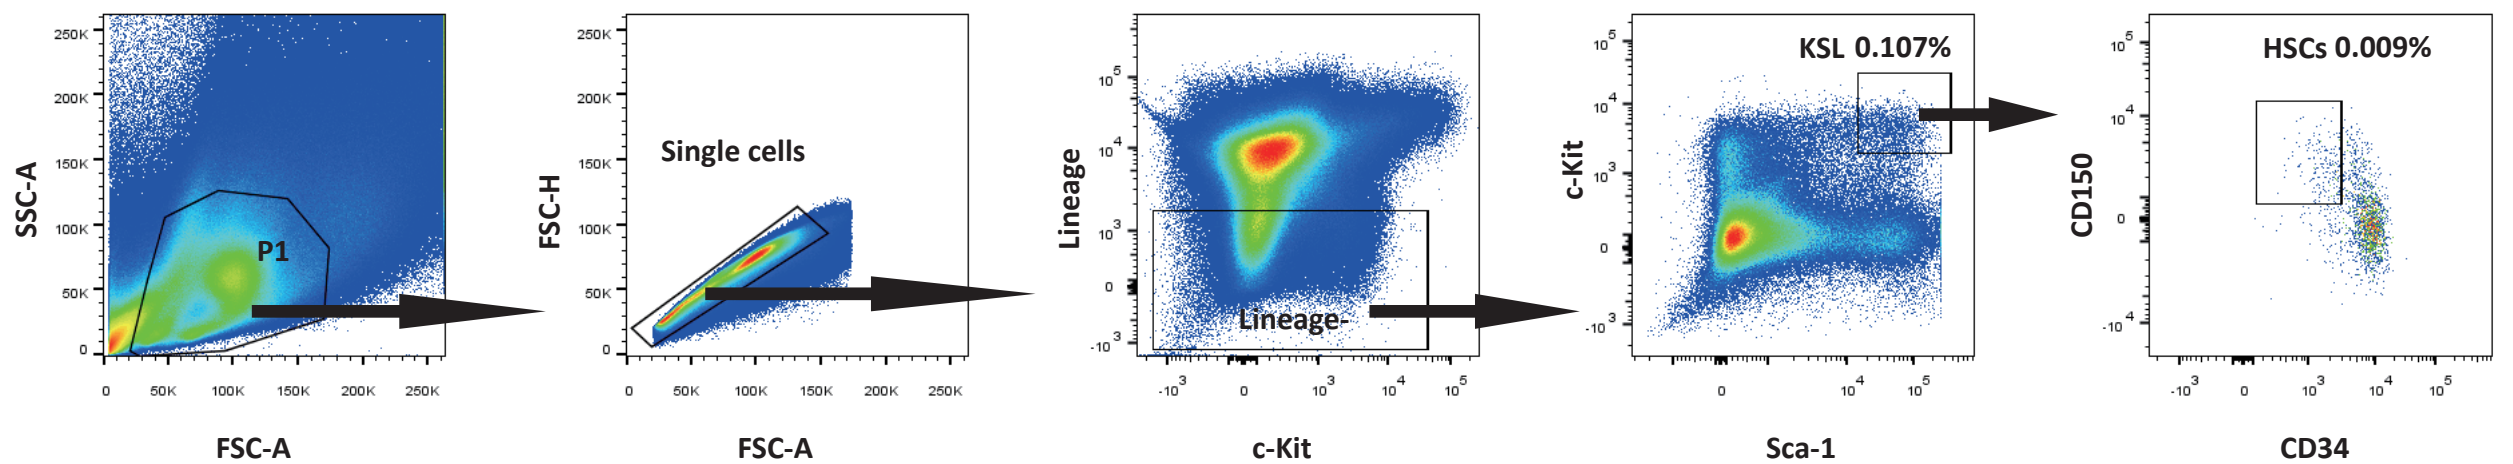

Supplement: 12015_2019_9930_MOESM1_ESM.pdf [file 12015_2019_9930_MOESM1_ESM.pdf]
